# Supplementary material for: Capsule Type of Streptococcus pneumoniae Determines Growth Phenotype
Source: PubMed Central journal article supplement (PMC3297593; doi:10.1371/journal.ppat.1002574), 2012-03-08
Supplement: ppat.1002574.s004.pdf [file ppat.1002574.s004.pdf]

**Table S1 - Wildtype clinical isolates from which non-typeable Janus mutants were constructed**

| Strain  | Origin      | Diagnosis    | Serotype | RFLP* | Capsule size (bp) | MLST |
|---------|-------------|--------------|----------|-------|-------------------|------|
| 103.57  | nasopharynx | otitis media | 23F      | 11    | 22330             | 507  |
| 106.66  | nasopharynx | otitis media | 6B       | 3     | 17506             | 2244 |
| 208.41  | nasopharynx | otitis media | 7F       | 8     | 24127             | 191  |
| 307.14  | nasopharynx | otitis media | 18C      | 14    | 21819             | 113  |
| B101.38 | blood       | pneumonia    | 5        | 28    | 19969             | 289  |
| B103.66 | blood       |              | 14       | 1     | 19918             | ¶    |
| B109.15 | blood       | pneumonia    | 7F       | 8     | 24127             | 191  |
| B110.04 | blood       |              | 7F       | 8     | 24127             | 191  |
| B201.61 | blood       |              | 18C      | 16    | 21819             | 1233 |
| B201.73 | blood       |              | 19F      | 40    | 19798             | 43   |

\*RFLP data was obtained as described in Hathaway LJ, Brugger S, Martynova A, Aebi S, Mühlemann K (2007) Use of the Agilent 2100 bioanalyzer for rapid and reproducible molecular typing of *Streptococcus pneumoniae*. J Clin Microbiol. 45: 803-9.

¶ Novel MLST: *aroE* allele 7, *gdh* allele 121, *gki* allele 10, *recP* allele 4, *spi* allele 6, *xpt* allele 58, *ddl* new allele with 99% match to allele 286.
