# Supplementary material for: Capsule Type of Streptococcus pneumoniae Determines Growth Phenotype
Source: PubMed Central journal article supplement (PMC3297593; doi:10.1371/journal.ppat.1002574), 2012-03-08
Supplement: ppat.1002574.s005.pdf [file ppat.1002574.s005.pdf]

**Table S2 - Capsule switch mutants**

| Recipient |           |      |                   | Donor   |           |      |                   | Capsule switch mutant |           |
|-----------|-----------|------|-------------------|---------|-----------|------|-------------------|-----------------------|-----------|
| Strain    | Sero-type | RFLP | Capsule size (bp) | Strain  | Sero-type | RFLP | Capsule size (bp) | Mutant                | Sero-type |
| 103.57    | 23F       | 11   | 22330             | 103.57  | 23F       | 11   | 22330             | 103.57cps103.57       | 23F       |
| 103.57    | 23F       | 11   | 22330             | 203.29  | 23F       | 11   | 22330             | 103.57cps203.29       | 23F       |
| 106.66    | 6B        | 3    | 17506             | 106.66  | 6B        | 3    | 17506             | 106.66cps106.66       | 6B        |
| 106.66    | 6B        | 3    | 17506             | 208.41  | 7F        | 8    | 24127             | 106.66cps208.41       | 7F        |
| 106.66    | 6B        | 3    | 17506             | B109.15 | 7F        | 8    | 24127             | 106.66cpsB109.15      | 7F        |
| 106.66    | 6B        | 3    | 17506             | B101.77 | 14        | 8    | 19918             | 106.66cpsB101.77      | 14        |
| 106.66    | 6B        | 3    | 17506             | 201.38  | 9V        | 1    | 20856             | 106.66cps201.38       | 9V        |
| 106.66    | 6B        | 3    | 17506             | 109.74  | 9V        | 1    | 20856             | 106.66cps109.74       | 9V        |
| 106.66    | 6B        | 3    | 17506             | 207.31  | 15        | 1    | 18626             | 106.66cps207.31       | 15        |
| 106.66    | 6B        | 3    | 17506             | 307.14  | 18C       | 14   | 21819             | 106.66cps307.14       | 18C       |
| 106.66    | 6B        | 3    | 17506             | B112.27 | 18C       | 14   | 21819             | 106.66cpsB112.27      | 18C       |
| 106.66    | 6B        | 3    | 17506             | 103.57  | 23F       | 11   | 22330             | 106.66cps103.57       | 23F       |
| 106.66    | 6B        | 3    | 17506             | 108.34  | 19F       | 39   | 19798             | 106.66cps108.34       | 19F       |
| 106.66    | 6B        | 3    | 17506             | 111.46  | 19F       | 4    | 19798             | 106.66cps111.46       | 19F       |
| 106.66    | 6B        | 3    | 17506             | 201.47  | 19F       | 7    | 19798             | 106.66cps201.47       | 19F       |
| 106.66    | 6B        | 3    | 17506             | B201.73 | 19F       | 40   | 19798             | 106.66cpsB201.73      | 19F       |
| 208.41    | 7F        | 8    | 24127             | 208.41  | 7F        | 8    | 24127             | 208.41cps208.41       | 7F        |
| 208.41    | 7F        | 8    | 24127             | B109.15 | 7F        | 8    | 24127             | 208.41cpsB109.15      | 7F        |
| 208.41    | 7F        | 8    | 24127             | B204.27 | 4         | 17   | 20936             | 208.41cpsB204.27      | 4         |
| 208.41    | 7F        | 8    | 24127             | 201.12  | 14        | 5    | 19918             | 208.41cps201.12       | 14        |
| 208.41    | 7F        | 8    | 24127             | B103.66 | 14        | 1    | 19918             | 208.41cpsB103.66      | 14        |
| 208.41    | 7F        | 8    | 24127             | 109.74  | 9V        | 1    | 20856             | 208.41cps109.74       | 9V        |
| 208.41    | 7F        | 8    | 24127             | 201.38  | 9V        | 1    | 20856             | 208.41cps201.38       | 9V        |
| 208.41    | 7F        | 8    | 24127             | 106.66  | 6B        | 3    | 17506             | 208.41cps106.66       | 6B        |
| 208.41    | 7F        | 8    | 24127             | 108.34  | 19F       | 39   | 19798             | 208.41cps108.34       | 19F       |
| 208.41    | 7F        | 8    | 24127             | B201.73 | 19F       | 40   | 19798             | 208.41cpsB201.73      | 19F       |

**Table S2 (continued)**

|         |     |    |       |         |     |    |       |                   |     |
|---------|-----|----|-------|---------|-----|----|-------|-------------------|-----|
| 208.41  | 7F  | 8  | 24127 | 103.57  | 23F | 11 | 22330 | 208.41cps103.57   | 23F |
| 208.41  | 7F  | 8  | 24127 | 203.29  | 23F | 11 | 22330 | 208.41cps203.29   | 23F |
| 208.41  | 7F  | 8  | 24127 | B201.61 | 18C | 16 | 21819 | 208.41cpsB201.61  | 18C |
| 208.41  | 7F  | 8  | 24127 | 307.14  | 18C | 14 | 21819 | 208.41cps307.14   | 18C |
| 307.14  | 18C | 14 | 21819 | 208.41  | 7F  | 8  | 24127 | 307.14cps208.41   | 7F  |
| 307.14  | 18C | 14 | 21819 | B101.77 | 14  | 8  | 19918 | 307.14cpsB101.77  | 14  |
| B101.38 | 5   | 28 | 19969 | 208.41  | 7F  | 8  | 24127 | B101.38cps208.41  | 7F  |
| B101.38 | 5   | 28 | 19969 | 203.39  | 4   | 17 | 20936 | B101.38cps203.39  | 4   |
| B101.38 | 5   | 28 | 19969 | 201.12  | 14  | 5  | 19918 | B101.38cps201.12  | 14  |
| B101.38 | 5   | 28 | 19969 | B101.77 | 14  | 8  | 19918 | B101.38cpsB101.77 | 14  |
| B101.38 | 5   | 28 | 19969 | 109.74  | 9V  | 1  | 20856 | B101.38cps109.74  | 9V  |
| B101.38 | 5   | 28 | 19969 | 201.38  | 9V  | 1  | 20856 | B101.38cps201.38  | 9V  |
| B101.38 | 5   | 28 | 19969 | 106.66  | 6B  | 3  | 17506 | B101.38cps106.66  | 6B  |
| B101.38 | 5   | 28 | 19969 | 108.34  | 19F | 39 | 19798 | B101.38cps108.34  | 19F |
| B101.38 | 5   | 28 | 19969 | B201.73 | 19F | 40 | 19798 | B101.38cpsB201.73 | 19F |
| B101.38 | 5   | 28 | 19969 | 203.29  | 23F | 11 | 22330 | B101.38cps203.29  | 23F |
| B101.38 | 5   | 28 | 19969 | 103.57  | 23F | 11 | 22330 | B101.38cps103.57  | 23F |
| B101.38 | 5   | 28 | 19969 | B201.61 | 18C | 16 | 21819 | B101.38cpsB201.61 | 18C |
| B101.38 | 5   | 28 | 19969 | 307.14  | 18C | 14 | 21819 | B101.38cps307.14  | 18C |
| B101.38 | 5   | 28 | 19969 | 207.31  | 15  | 1  | 18626 | B101.38cps207.31  | 15  |
| B103.66 | 14  | 1  | 19918 | B103.66 | 14  | 1  | 19918 | B103.66cpsB103.66 | 14  |
| B103.66 | 14  | 1  | 19918 | 201.12  | 14  | 5  | 19918 | B103.66cps201.12  | 14  |
| B103.66 | 14  | 1  | 19918 | 106.66  | 6B  | 3  | 17506 | B103.66cps106.66  | 6B  |
| B103.66 | 14  | 1  | 19918 | B201.73 | 19F | 40 | 19798 | B103.66cpsB201.73 | 19F |
| B103.66 | 14  | 1  | 19918 | B112.27 | 18C | 14 | 21819 | B103.66cpsB112.27 | 18C |
| B103.66 | 14  | 1  | 19918 | 207.31  | 15  | 1  | 18626 | B103.66cps207.31  | 15  |
| B109.15 | 7F  | 8  | 24127 | B109.15 | 7F  | 8  | 24127 | B109.15cpsB109.15 | 7F  |
| B109.15 | 7F  | 8  | 24127 | 106.66  | 6B  | 3  | 17506 | B109.15cps106.66  | 6B  |
| B109.15 | 7F  | 8  | 24127 | 108.34  | 19F | 39 | 19798 | B109.15cps108.34  | 19F |

**Table S2 (continued)**

|         |     |    |       |         |     |    |       |                   |     |
|---------|-----|----|-------|---------|-----|----|-------|-------------------|-----|
| B109.15 | 7F  | 8  | 24127 | 103.57  | 23F | 11 | 22330 | B109.15cps103.57  | 23F |
| B109.15 | 7F  | 8  | 24127 | 203.29  | 23F | 11 | 22330 | B109.15cps203.29  | 23F |
| B109.15 | 7F  | 8  | 24127 | B201.61 | 18C | 16 | 21819 | B109.15cpsB201.61 | 18C |
| B109.15 | 7F  | 8  | 24127 | 307.14  | 18C | 14 | 21819 | B109.15cps307.14  | 18C |
| B109.15 | 7F  | 8  | 24127 | B201.73 | 19F | 40 | 19798 | B109.15cpsB201.73 | 19F |
| B109.15 | 7F  | 8  | 24127 | 207.31  | 15  | 1  | 18626 | B109.15cps207.31  | 15  |
| B110.04 | 7F  | 8  | 24127 | B201.73 | 19F | 40 | 19798 | B110.04cpsB201.73 | 19F |
| B110.04 | 7F  | 8  | 24127 | 203.29  | 23F | 11 | 22330 | B110.04cps203.29  | 23F |
| B110.04 | 7F  | 8  | 24127 | B112.27 | 18C | 14 | 21819 | B110.04cpsB112.27 | 18C |
| B201.61 | 18C | 16 | 21819 | B101.77 | 14  | 8  | 19918 | B201.61cpsB101.77 | 14  |
| B201.61 | 18C | 16 | 21819 | 109.74  | 9V  | 1  | 20856 | B201.61cps109.74  | 9V  |
| B201.61 | 18C | 16 | 21819 | 203.29  | 23F | 11 | 22330 | B201.61cps203.29  | 23F |
| B201.73 | 19F | 40 | 19798 | 208.41  | 7F  | 8  | 24127 | B201.73cps208.41  | 7F  |
| B201.73 | 19F | 40 | 19798 | B101.77 | 14  | 8  | 19918 | B201.73cpsB101.77 | 14  |
| B201.73 | 19F | 40 | 19798 | 201.12  | 14  | 5  | 19918 | B201.73cps201.12  | 14  |
| B201.73 | 19F | 40 | 19798 | 201.38  | 9V  | 1  | 20856 | B201.73cps201.38  | 9V  |
| B201.73 | 19F | 40 | 19798 | 109.74  | 9V  | 1  | 20856 | B201.73cps109.74  | 9V  |
| B201.73 | 19F | 40 | 19798 | 203.39  | 4   | 17 | 20936 | B201.73cps203.39  | 4   |
| B201.73 | 19F | 40 | 19798 | 106.66  | 6B  | 3  | 17506 | B201.73cps106.66  | 6B  |
| B201.73 | 19F | 40 | 19798 | 103.57  | 23F | 11 | 22330 | B201.73cps103.57  | 23F |
| B201.73 | 19F | 40 | 19798 | 203.29  | 23F | 11 | 22330 | B201.73cps203.29  | 23F |
| B201.73 | 19F | 40 | 19798 | B112.27 | 18C | 14 | 21819 | B201.73cpsB112.27 | 18C |
| B201.73 | 19F | 40 | 19798 | B201.61 | 18C | 16 | 21819 | B201.73cpsB201.61 | 18C |
| B201.73 | 19F | 40 | 19798 | 307.14  | 18C | 14 | 21819 | B201.73cps307.14  | 18C |
| B201.73 | 19F | 40 | 19798 | 207.31  | 15  | 1  | 18626 | B201.73cps207.31  | 15  |
| B201.73 | 19F | 40 | 19798 | B201.73 | 19F | 40 | 19798 | B201.73cpsB201.73 | 19F |
