# Supplementary material for: Capsule Type of Streptococcus pneumoniae Determines Growth Phenotype
Source: PubMed Central journal article supplement (PMC3297593; doi:10.1371/journal.ppat.1002574), 2012-03-08
Supplement: ppat.1002574.s006.pdf [file ppat.1002574.s006.pdf]

**Table S3 – Primers used in construction of capsule switch mutants**

| Primer            | Sequence                           | Description                                                                                                                 |
|-------------------|------------------------------------|-----------------------------------------------------------------------------------------------------------------------------|
| dexB vorstart     | ggatagtaatgaagatggagttggtga        | Control of correct place of Janus cassette, LRPCR for control of correct ligation of capsule to upstream flanking region    |
| kan_B1            | gatattctcatttagccattattatttc       | Control of correct place of Janus cassette                                                                                  |
| kan_start_F1      | aggaaataataaatggctaaatgagaat       | Control of correct size of Janus cassette                                                                                   |
| DAM351            | cttccttatgctttggac                 | Control of correct size of Janus cassette. Sequencing primer for <i>str</i> allele                                          |
| rpsL_mitte_B1     | gaatttacgaagggctgagtaggttt         | Control of intact Janus cassette and correct place of the Janus cassette                                                    |
| rpsL_mitte_F1     | aaaaaacctaactcagcccttcgtaa         | Control of correct place of the Janus cassette                                                                              |
| DAM350            | accaaaaataaaaaaacacaggag           | Sequencing primer for <i>str</i> allele                                                                                     |
| dexBstart2        | tttctccgtttatgacagccctatgg         | Amplification of Janus cassette                                                                                             |
| aliAend2          | aagattggacgccctgtacgagatgt         | Amplification of Janus cassette                                                                                             |
| aliAend1b         | ctggttcactgtacctttatttct           | Control of correct place of Janus cassette and control of correct ligation of capsule to downstream capsule flanking region |
| dexB-cpsA_REV     | ctatctgctaaaacagcgacactga          | LRPCR for control of correct ligation of capsule to upstream capsule flanking region                                        |
| cpsO_F1           | caaattggccaattaggaacgg             | Control of correct ligation of capsule to downstream capsule flanking region                                                |
| 1430TRZ           | tgccaatgaagagcaagacttgacagtag      | LRPCR detection of capsule operon and RFLP                                                                                  |
| 1402TRZ           | caattgtcacgcccgaagggaagt           | LRPCR detection of capsule operon and RFLP                                                                                  |
| LRPdexB_vorstart1 | tggatagtaatgaagatggagttggtgattgco  | LRPCR detection of Janus cassette                                                                                           |
| LRPaliA_end1      | catgttttgcgagatcttcttgagccottttatt | LRPCR detection of Janus cassette                                                                                           |
| TTM07_TRZ         | ctactgttcaagtcttctcttcattggaca     | LRPCR detection of capsule upstream flanking region for RFLP                                                                |

**Table S3 (continued)**

|           |                                |                                                                |
|-----------|--------------------------------|----------------------------------------------------------------|
| TTM09_TRZ | ctaaaacaggggaaattctggcaacaacgc | LRPCR detection of capsule upstream flanking region for RFLP   |
| TTM08_TRZ | acttgcccttgccggcgtagacattattg  | LRPCR detection of capsule downstream flanking region for RFLP |
| TTM10_TRZ | aatcgcgaaacgtcccagccgtggaaactc | LRPCR detection of capsule downstream flanking region for RFLP |
