# Supplementary material for: Capsule Type of Streptococcus pneumoniae Determines Growth Phenotype
Source: PubMed Central journal article supplement (PMC3297593; doi:10.1371/journal.ppat.1002574), 2012-03-08
Supplement: ppat.1002574.s007.pdf [file ppat.1002574.s007.pdf]

**Table S4 – Composition of modified Lacks medium (MLM) – a modification of the medium described by Lacks [1]**

| <b>Component</b>                       | <b>Amount / litre</b> |
|----------------------------------------|-----------------------|
| casamino acids (Bacto)                 | 1.25 g                |
| casein hydrolysate (Bacto)             | 0.25 g                |
| tryptophan (Sigma)                     | 1.5 mg                |
| cysteine HCl (Merck)                   | 10 mg                 |
| asparagine (Sigma)                     | 12.5 mg               |
| glutamine (Merck)                      | 2.5 mg                |
| choline HCl                            | 5 mg                  |
| adenine                                | 5 mg                  |
| sodium acetate                         | 2 g                   |
| K <sub>2</sub> HPO <sub>4</sub>        | 8.5 g                 |
| MgCl <sub>2</sub> · 6 H <sub>2</sub> O | 0.5 g                 |
| CaCl <sub>2</sub>                      | 0.6 mg                |
| MnSO <sub>4</sub> · 4 H <sub>2</sub> O | 0.2 mg                |
| FeSO <sub>4</sub> · 7 H <sub>2</sub> O | 0.5 mg                |
| CuSO <sub>4</sub> · 5 H <sub>2</sub> O | 0.5 mg                |
| ZnSO <sub>4</sub> · 7 H <sub>2</sub> O | 0.5 mg                |
| NaHCO <sub>3</sub>                     | 0.4 g                 |
| biotin                                 | 0.6 µg                |
| nicotinic acid                         | 0.3 mg                |
| pyridoxine·HCl                         | 0.3 mg                |
| thiamine·HCl                           | 0.3 mg                |
| riboflavine                            | 0.14 mg               |
| calcium pantothenate                   | 1.2 mg                |
| sucrose                                | 3.423 g               |
| catalase from bovine liver (Sigma)     | 12000 units           |

**pH adjusted to 7.3**

**1. Lacks S (1966) Integration efficiency and genetic recombination in pneumococcal transformation. Genetics 53: 207-235.**
